# Supplementary material
Source: PubMed Central journal article supplement (PMC8329272)
Supplement: plantbiotechnology-38-2-21.0308a-s002.pdf [file plantbiotechnology-38-2-21.0308a-s002.pdf]

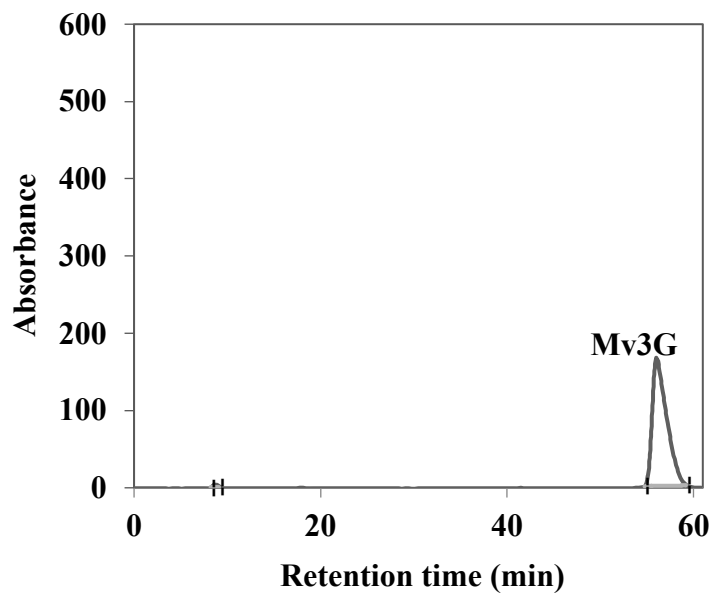

Supplementary Figure S2.

HPLC analysis of Cpur5GT reaction product obtained from the *in vitro* enzyme assay.

The reaction used Mv3G as the acceptor substrate and UDP-galactose as the sugar donor.
